# Supplementary material for: A polysaccharide deacetylase from Puccinia striiformis f. sp. tritici is an important pathogenicity gene that suppresses plant immunity
Source: PubMed Central journal article supplement (PMC7336287; doi:10.1111/pbi.13345), 2020-03-04
Supplement: PBI-18-1830-s010.pdf [file PBI-18-1830-s010.pdf]

**Table S1 Characteristic of 5 pairs of highly similar gene clusters in *Pst* genome**

| Species                   | Gene ID    | Transcript ID | Similarity (nucleotide) | Similarity (AA) | Signal peptides (aa) | Structure            | Sublocation                   |
|---------------------------|------------|---------------|-------------------------|-----------------|----------------------|----------------------|-------------------------------|
|                           | PSTG_13661 | KNE92947      |                         |                 | 1-24                 |                      | apoplactic                    |
|                           | PSTG_13662 | KNE92948      | 80.03%                  | 82.12%          | 1-24                 |                      | non-apoplactic, mitochondrial |
|                           | PSTG_13644 | KNE92928      |                         |                 | 1-35                 |                      | apoplactic                    |
| <i>Puccinia</i>           | PSTG_13645 | KNE92929      | 58.14%                  | 50.57%          | 1-32                 |                      | apoplactic                    |
| <i>striiformis</i> f. sp. | PSTG_06370 | KNF00442      |                         |                 | NO                   | transmembrane region |                               |
| <i>tritici PST-78</i>     | PSTG_06371 | KNF00443      | 57.86%                  | 47.34%          | 1-27                 |                      | Non-apoplactic                |
| (ASM14938v1)              | PSTG_06025 | KNF00609      |                         |                 | 1-21                 |                      | Non-apoplactic                |
|                           | PSTG_06026 | KNF00610      | 66.91%                  | 63.06%          | 1-21                 |                      | Non-apoplactic                |
|                           | PSTG_03021 | KNF03934      |                         |                 | NO                   | transmembrane region |                               |
|                           | PSTG_03021 | KNF03935      | 72.76%                  | 72.77%          | NO                   | transmembrane region |                               |
