# Supplementary material for: A polysaccharide deacetylase from Puccinia striiformis f. sp. tritici is an important pathogenicity gene that suppresses plant immunity
Source: PubMed Central journal article supplement (PMC7336287; doi:10.1111/pbi.13345), 2020-03-04
Supplement: PBI-18-1830-s011.pdf [file PBI-18-1830-s011.pdf]

| Primer name      | Sequence (5'-3')                                                     | Application                        |
|------------------|----------------------------------------------------------------------|------------------------------------|
| Pst_13661-F      | ggaattcATGGGTTTTACTCGCTTACTAAC                                       |                                    |
| Pst_13661-R      | ccgctcgagACCAGTGACTTGATCGAATCTC                                      | Secretion assay                    |
| Pst_13661-F      | ggcatcgatTACCATACGACGTCCAGACTACGCTATGGGTTTTACTCGCTTACTAAC            |                                    |
| Pst_13661-R      | catgtcgacCTATTCGAAGTTTCCGGGTAAC                                      | Suppression Bax-PCD                |
| Pst_13661-F      | gGAATTCATGGCCCACACAAATGATATC                                         |                                    |
| Pst_13661-R      | cgGGATCCCTATTTCGAAGTTTCCGGGTAAC                                      |                                    |
| Pst_13661-HA-F   | TTACAATTATCGATACAATGTACCATACGACGTCCAGACTACGCTATGGCCCACACAAATGATATC   |                                    |
| Pst_13661-HA-R   | CTCATTAAAGCAGGACAAGCCTATTTCGAAGTTTCCGGGTAAC                          |                                    |
| Pst_13661-Flag-F | TTACAATTATCGATACAATGGATTACAAGGATGACGACGATAAGATGGCCCACACAAATGATATC    |                                    |
| Pst_13661-F      | cgGGATCCATGGGTTTTACTCGCTTACTAAC                                      |                                    |
| Pst_13661-R      | cctcgagTTCGAAGTTTCCGGGTAAC                                           | Interaction assay                  |
| Pst_13662DNA-F   | CCTTGCCAGCTCACCCCTC                                                  |                                    |
| Pst_13662DNA-R   | AGACAAATCGCCTCAAAGTCCT                                               |                                    |
| Pst_13661DNA-F   | ACACTCTCCCAAGGAAATCATC                                               |                                    |
| Pst_13661DNA-R   | GGAGCTCAACAAGGTATGAAAG                                               | Amplification gene                 |
| PstEF-F          | TTCGCCGTCCGTGATATGAGACAA                                             |                                    |
| PstEF-R          | ATGCGTATCATGGTGGTGGAGTGA                                             |                                    |
| TaEF-F           | TGGTGTCAATCAAGCCTGGTATGGT                                            |                                    |
| TaEF-R           | ACTCATGGTGCATCTCAACGGACT                                             |                                    |
| 1Pst_3661-qrt-F  | CTCGTTGTACCCGTCGC                                                    |                                    |
| Pst_13661-qrt-R  | AGGTAGAGTCCAATCTTGTGCT                                               |                                    |
| Pst_13662-qrt-F  | CATCCCAGCCCCAAGC                                                     |                                    |
| Pst_13662-qrt-R  | GCAGGTCCACGAGTCATCC                                                  |                                    |
| Pst_13645-qrt-F  | GGAATGGGGTTTGCTC                                                     |                                    |
| Pst_13645-qrt-R  | CTTTAGTGTITGCTGCGTT                                                  |                                    |
| NbAct-F          | GTTGCTATACAAGCTGTTCTCTCG                                             |                                    |
| NbAct-R          | GTCAAGACGAAGAATGACATGTGG                                             |                                    |
| NbPR1a-F         | CGACCAGGTAGCAGCCTATG                                                 |                                    |
| NbPR1a-R         | TCTCAACAGCCTTAGCAGCC                                                 |                                    |
| NbPR2-F          | GGGCTGTAAATTTGCAGTATCC                                               |                                    |
| NbPR2-R          | GGTTTATAACATCTTGGTCTGATGG                                            |                                    |
| NbWRKY12-F       | CTCATCAGCTAGTTCATTTGATGC                                             |                                    |
| NbWRKY12-R       | AGCTCGGTCTTTGTTCTAAAAGC                                              |                                    |
| TaPR1-F          | GAGAATGCAGACGCCAAGC                                                  |                                    |
| TaPR1-R          | CTGGAGCTTGCAGTCGTTGATC                                               |                                    |
| TaPR2-F          | AGGATGTGCTTCCATGTTTGCCG                                              |                                    |
| TaPR2-R          | AAGTAGATGCGCATGCCGTTGATG                                             | qRT-PCR                            |
| Pst_13661-HIGS-F | ataTTAATTAAGCAAATGCCAAAGGAAGCTT                                      |                                    |
| Pst_13661-HIGS-R | tatGCGGCCGCAATCCTTTGTATCCTCGGTCT                                     | HIGS assay                         |
| 13661-mCherry-F  | TTACAATTATCGATACAATGATGGGTTTTACTCGCTTACTAAC                          |                                    |
| 13661-mCherry-R  | CACCATCCTAGGACTAGTTTGTAGCGTAGTCTGGGACGTCGATGGGTAITTCGAAGTTTCCGGGTAAC | Sub-localization                   |
| 13661-RNAi-S     | ACACAAATGATATCCGCACCTT                                               | Identification of transgenic plant |
| 13661-RNAi-AS    | AATGGCCGTTGTTGAATCTTT                                                |                                    |
